# Supplementary material for: Exogenous Antioxidants Improve the Accumulation of Saturated and Polyunsaturated Fatty Acids in Schizochytrium sp. PKU#Mn4
Source: MDPI journal article supplement (doi:10.3390/md19100559), 2021-09-30
Supplement: s1 [file s1]

## **Supplementary information**

### **Exogenous Antioxidants Improve the Accumulation of Saturated and Polyunsaturated Fatty Acids in *Schizochytrium* sp. PKU#Mn4**

Sai Zhang<sup>1,2,†</sup>, Xiaohong Chen<sup>1,†</sup>, Biswarup Sen<sup>1</sup>, Mohan Bai<sup>1</sup>, Yaodong He<sup>1,\*</sup>,  
Guangyi Wang<sup>1, 3,\*</sup>

<sup>1</sup>Center for Marine Environmental Ecology, School of Environmental Science and  
Engineering, Tianjin University, Tianjin 300072, China

<sup>2</sup>Polar Research Institute of China, Shanghai 200136, China

<sup>3</sup>Key Laboratory of Systems Bioengineering (Ministry of Education), Tianjin  
University, Tianjin 300072, China

**\*Corresponding author.**

E-mail: yaodong.he@tju.edu.cn; gywang@tju.edu.cn

**Table S1.** Experiment design and response values for screening antioxidants.

| Run | A  | B  | C  | D  | E  | F  | G  | Response | Response   |
|-----|----|----|----|----|----|----|----|----------|------------|
|     |    |    |    |    |    |    |    | DCW      | TFA        |
|     |    |    |    |    |    |    |    | (g/L)    | (mg/g DCW) |
| 1   | 1  | -1 | 1  | 1  | -1 | -1 | 1  | 5.37     | 388.91     |
| 2   | -1 | -1 | -1 | 1  | -1 | 1  | 1  | 4.82     | 275.76     |
| 3   | -1 | -1 | 1  | 1  | 1  | -1 | -1 | 5.06     | 413.74     |
| 4   | 1  | -1 | -1 | 1  | 1  | 1  | -1 | 5.07     | 346.80     |
| 5   | 1  | 1  | -1 | 1  | -1 | -1 | -1 | 4.82     | 328.25     |
| 6   | -1 | 1  | -1 | 1  | 1  | -1 | 1  | 4.81     | 406.51     |
| 7   | 1  | -1 | 1  | -1 | -1 | 1  | -1 | 5.66     | 278.90     |
| 8   | 1  | 1  | -1 | -1 | -1 | 1  | 1  | 5.24     | 386.31     |
| 9   | 1  | 1  | 1  | 1  | 1  | 1  | 1  | 4.57     | 395.81     |
| 10  | -1 | 1  | 1  | -1 | -1 | -1 | 1  | 5.22     | 324.15     |
| 11  | -1 | -1 | -1 | -1 | -1 | -1 | -1 | 5.54     | 351.40     |
| 12  | -1 | 1  | 1  | 1  | -1 | 1  | -1 | 5.10     | 339.30     |
| 13  | 1  | -1 | -1 | -1 | 1  | -1 | 1  | 4.49     | 289.09     |
| 14  | -1 | 1  | -1 | -1 | 1  | 1  | -1 | 4.76     | 395.02     |
| 15  | 1  | 1  | 1  | -1 | 1  | -1 | -1 | 4.73     | 320.20     |
| 16  | -1 | -1 | 1  | -1 | 1  | 1  | 1  | 5.45     | 265.63     |

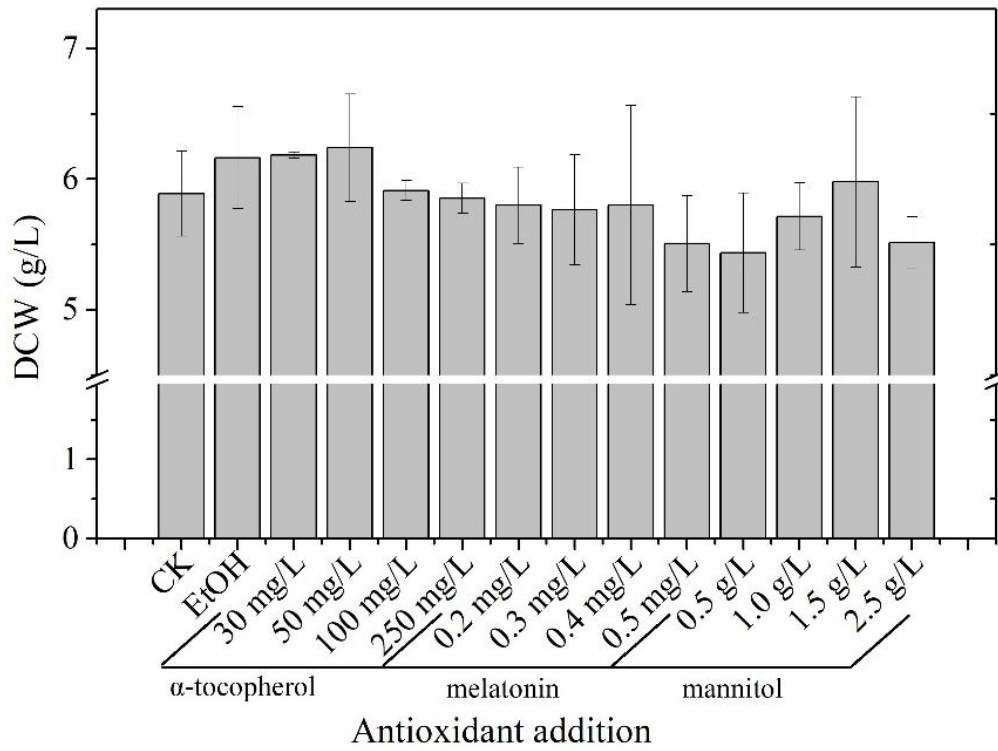

**Figure S1.** Effects of  $\alpha$ -tocopherol, melatonin, and mannitol on the dry cell weight (DCW) of *Schizochytrium* PKU#Mn4 culture. CK stands for the control group with water.

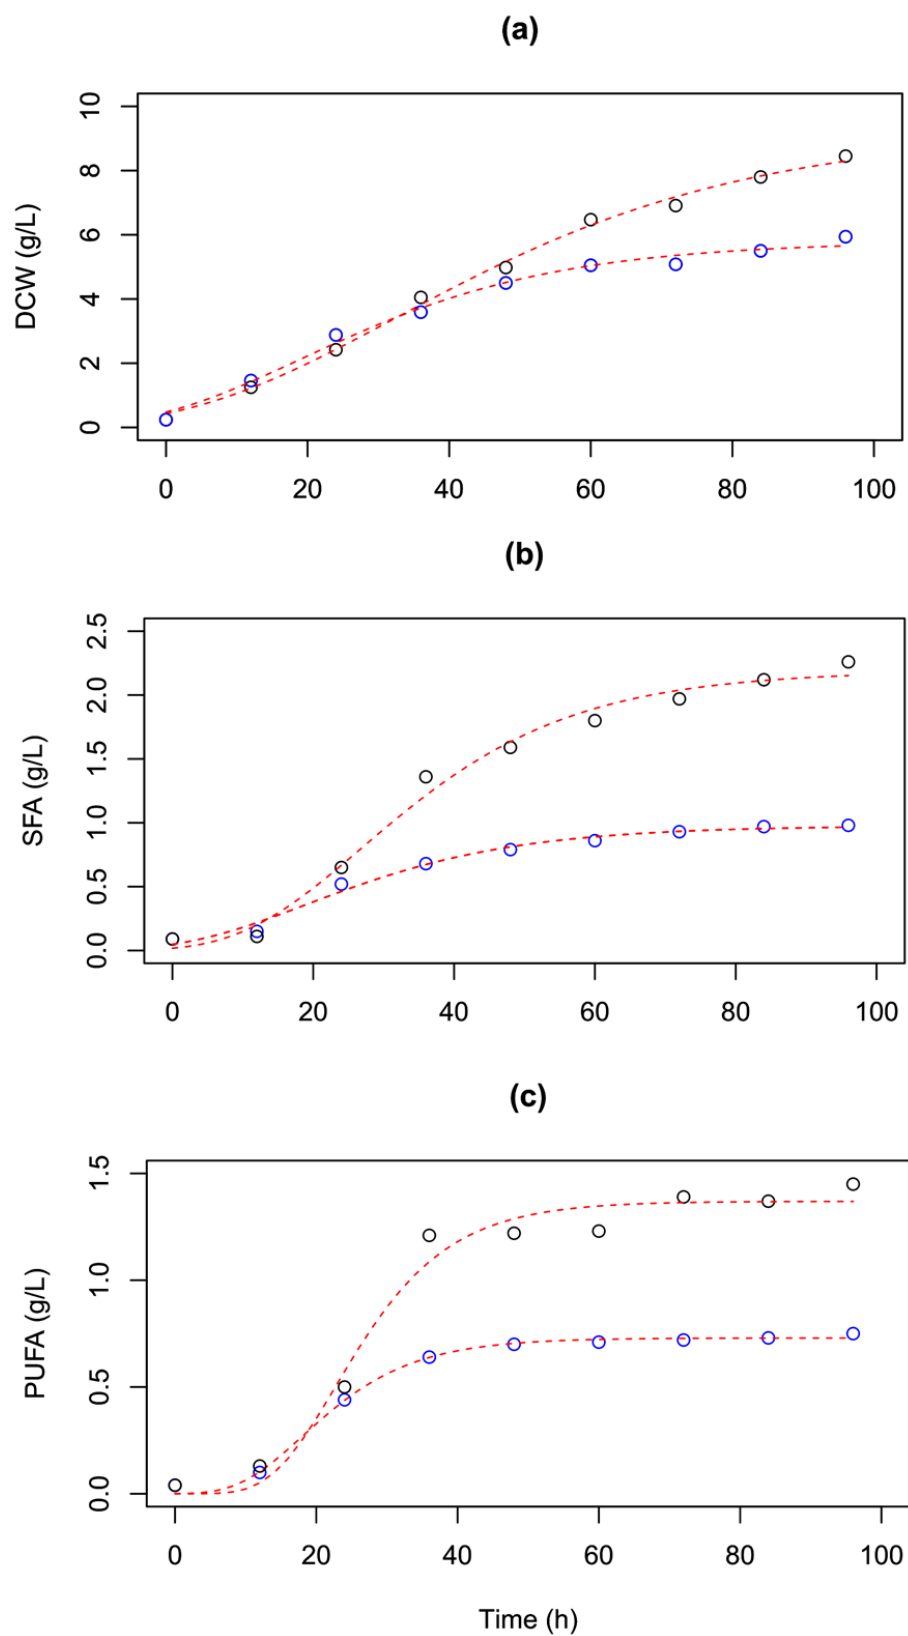

**Figure S2.** Experimental data and prediction using modified Gompertz model. The ‘o’ (black: w/ MA, blue: w/o MA) and the ‘---’ indicate the experimental and predicted data, respectively.

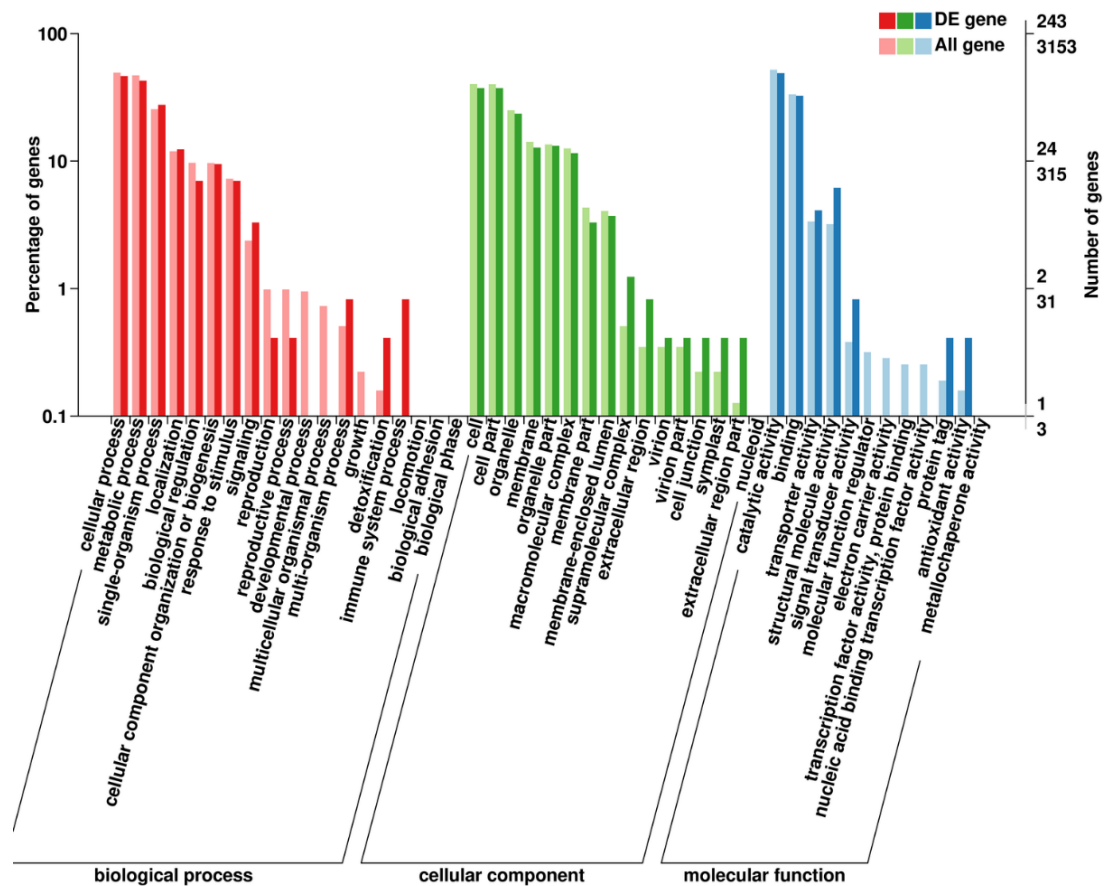

**Figure S3.** GO classification of differentially expressed genes. The lower and upper numbers on the right y-axis indicate the numbers of total genes and the DEGs, respectively.
